# Supplementary material
Source: PubMed Central journal article supplement (PMC10903330)
Supplement: NIHMS1969670-supplement-SI.pdf [file NIHMS1969670-supplement-SI.pdf]

**Supplementary Information:**  
**Computational Design of ACE2-Based Peptide Inhibitors of  
SARS-CoV-2**

Yanxiao Han<sup>1</sup>, and Petr Král<sup>1,2\*</sup>

<sup>1</sup>*Department of Chemistry, University of Illinois at Chicago,  
Chicago, Illinois 60607, United States and*

<sup>2</sup>*Departments of Physics, Biopharmaceutical Sciences,  
and Chemical Engineering, University of Illinois at Chicago,  
Chicago, Illinois 60607, United States.*

(Dated: April 13, 2020)

Table S1: Sequence of one letter code for all the inhibitors

|                    | <b>Sequence</b>                                                                                                                                                                                                                                |
|--------------------|------------------------------------------------------------------------------------------------------------------------------------------------------------------------------------------------------------------------------------------------|
| <b>Inhibitor 1</b> | residue 21 to 55<br><b>I EEQA KTFLD KFNHE AEDLF YQSSLASWNY NTNIT</b>                                                                                                                                                                           |
| <b>Inhibitor 2</b> | residues 21 to 88 and 349 to 357<br><b>(1) I EEQA KTFLD KFNHE AEDLF YQSSLASWNY NTNIT EENVQ<br/>NMNNA GDKWS AFLKE QSTLA QMYPL QEI</b><br><b>(2) WD LGKGD FR</b>                                                                                 |
| <b>Inhibitor 3</b> | residues 21 to 105 and 323 to 362<br><b>(1) I EEQA KTFLD KFNHE AEDLF YQSSLASWNY NTNIT EENVQ<br/>NMNNA GDKWS AFLKE QSTLA QMYPL QEIQAL LTVKL QLQAL<br/>QQNGS</b><br><b>(2) MTQ GFWEN SMLTD PGNVQ KAVCH PTAWD LGKGD FRILM<br/>CT</b>              |
| <b>Inhibitor 4</b> | residues 21 to 95 and 335 to 400<br><b>(1) I EEQA KTFLD KFNHE AEDLF YQSSLASWNY NTNIT EENVQ<br/>NMNNA GDKWS AFLKE QSTLA QMYPL QEIQAL LTVKL</b><br><b>(2) D PGNVQ KAVCH PTAWD LGKGD FRILM CTKVT MDDFL<br/>TAHHE MGHIQ YDMAYA QPF LLRNG ANEGF</b> |

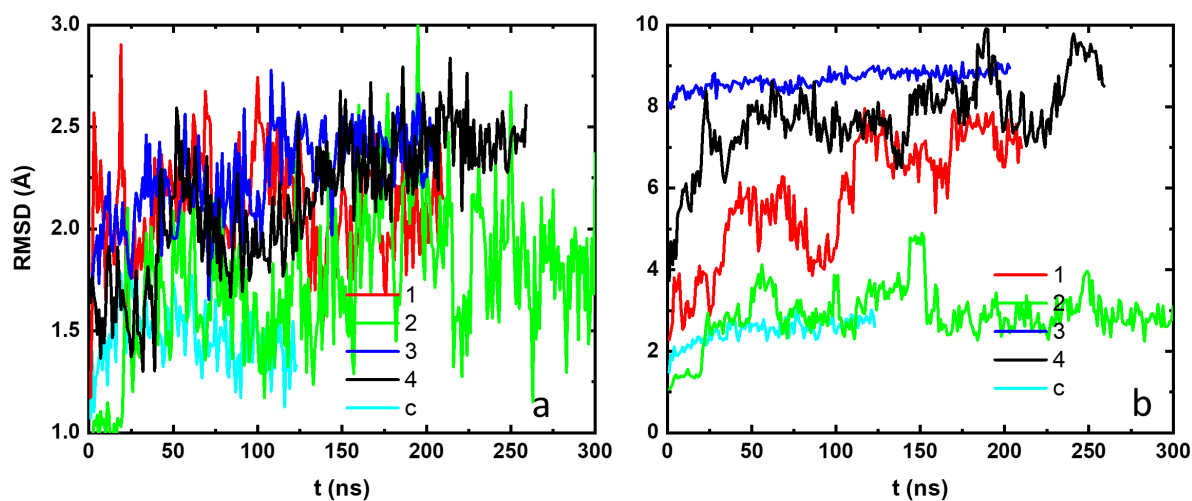

Figure S1: (a) RMSD for the critical amino acids in each inhibitor; (b) RMSD for the whole inhibitors when they bind with the RBD of SARS-CoV-2. Numbering scale: 1-4 - inhibitors 1-4 with RBD; C - control system of PD from ACE2 and the RBD of SARS-CoV-2.

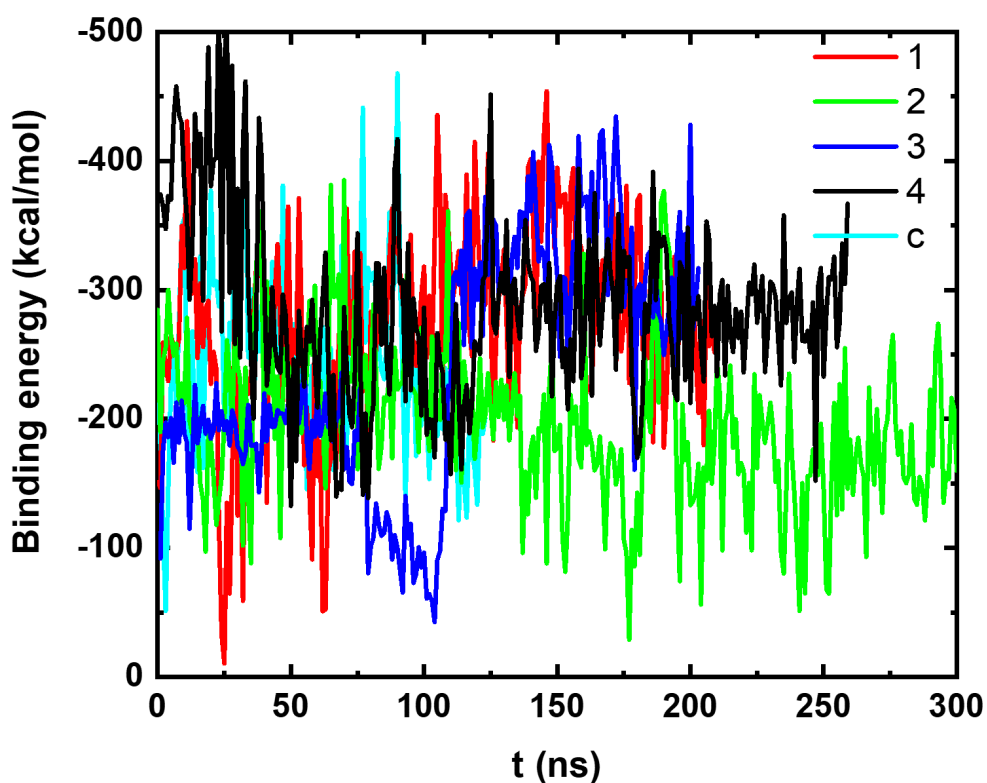

Figure S2: The interaction energies between the contact residues of inhibitors (or ACE2) and SARS-CoV-2. Numbering scale: 1-4 - inhibitors 1-4 with RBD; C - control system of PD from ACE2 and the RBD of SARS-CoV-2.
